# Supplementary material
Source: Springer Nature journal article supplement (https://www.springermedizin.de/resource/supplementary/12943_2009_588_MOESM1_ESM.pdf/9555040)

# Maslinic acid

**A**

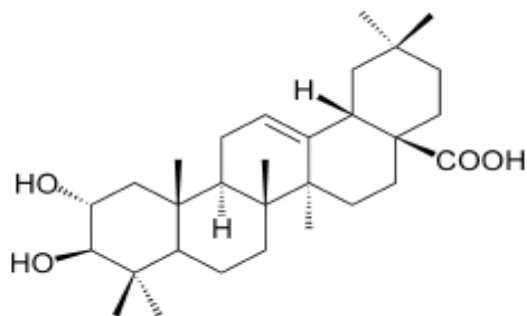

**B**

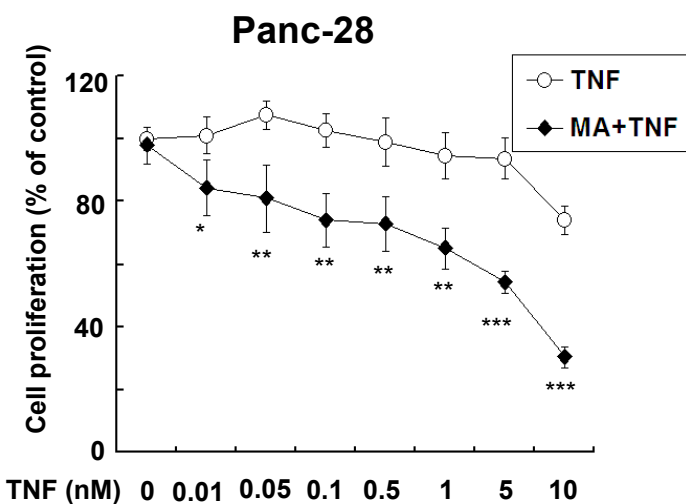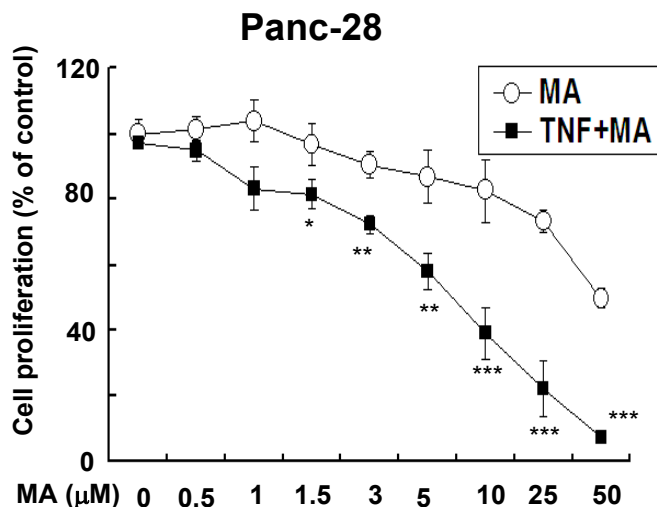

**C**

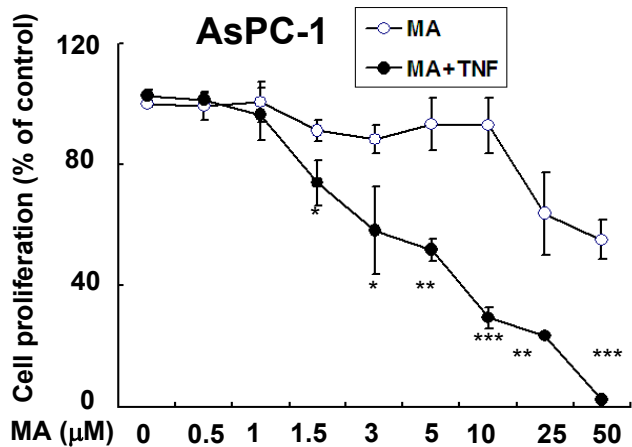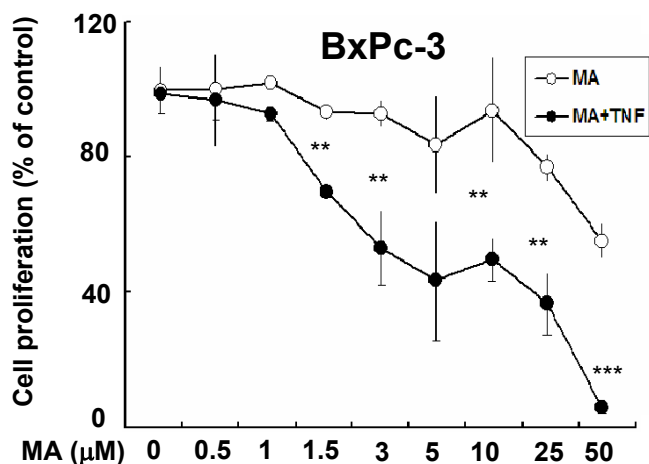

Supplement: MOESM1 [file 9555040]
